# Supplementary material for: Empowering Patients to Self-Manage Common Infections: Qualitative Study Informing the Development of an Evidence-Based Patient Information Leaflet
Source: Antibiotics (Basel). 2021 Sep 15;10(9):1113. doi: 10.3390/antibiotics10091113 (PMC8464808; doi:10.3390/antibiotics10091113)
Supplement: Supplementary file 1 [file antibiotics-10-01113-s001.zip]

Archive with 5 entries (5 files):
- Supplementary S1 patient and HCP interview schedules.pdf
- Supplementary S2 HCP and minority ethnic patient questionnaires.pdf
- Table S1.pdf
- Table S2.pdf
- Table S3.pdf
